# Supplementary material for: Association Between Hospital Resuscitation Champion and Survival for In‐Hospital Cardiac Arrest
Source: PubMed Central journal article supplement — J Am Heart Assoc. 2021 Feb 15;10(5):e017509. doi: 10.1161/JAHA.120.017509 (PMC8174239; doi:10.1161/jaha.120.017509), 2021-02-15
Supplement: JAH3-10-e017509-s001.pdf [file JAH3-10-e017509-s001.pdf]

# **SUPPLEMENTAL MATERIAL**

## **APPENDIX**

### **American Heart Association's Get With the Guidelines®-Resuscitation Investigators from the Adult Research Task Force members**

Anne Grossestreuer PhD; Ari Moskowitz MD; Dana Edelson MD MS; Joseph Ornato MD; Mary Ann Peberdy MD; Matthew Churpek MD MPH PhD; Michael Kurz MD MS-HES; Monique Anderson Starks MD MHS; Paul Chan MD MSc; Saket Girotra MBBS SM; Sarah Perman MD MSCE; and Zachary Goldberger MD MS
